# Supplementary material
Source: publisher site journal article supplement (https://www.dovepress.com/article/347512)
Supplement: Supplementary file 1 [file get_supplementary_file.php]

Supplementary Table 1. Procedure and Diagnosis Codes

| **Procedures and/or Diagnoses** | **ICD-9 Codes** | **ICD-10 Codes** | **HCPCS/CPT** |
| --- | --- | --- | --- |
| Knee OA | 715.06, 715.16, 715.26, 715.36, 715.86, or 715.96  (715.08, 715.18, 715.28, 715.38, 715.88, 715.98, 715.09, 715.19, 715.29, 715.39, 715.89, 715.99, 715.00, 715.10, 715.20, 715.30, 715.80, 715.90) AND 719.46 on same claim | M17.0, M17.1, M17.10, M17.11, M17.12, M17.2, M17.3, M17.30, M17.31, M17.32, M17.4, M17.5, or M17.9  (M15.0, M15.3, M15.4, M15.8, M15.9, M19.90, M19.91, M19.92, M19.93) AND (M25.561, M25.562, M25.569) on same claim | n/a |
| Primary knee arthroplasty | n/a | n/a | 27446, 27447 |
| Bio-fermentation derived hyaluronic acid injection | n/a | n/a | HCPCS J7323 (with concurrent CPT 20610 or 20611 and knee OA diagnosis on same date)  For those without CPT 20610 or 20611, include those without small joint injection on the same date (CPT 20552-20553 (trigger point), CPT 20526 (carpal tunnel), CPT 20600 (small joint/bursa), CPT 20604 (small joint/bursa), CPT 20605 (intermediate joint/bursa), CPT 20606 (intermediate joint/bursa), or CPT 20612 (ganglion cyst)) |
| Non-bio-fermentation derived hyaluronic acid injection | n/a | n/a | HCPCS J7320, J7321, J7322, J7324, J7325, J7326, J7327, J7328, C9465, C9471, Q9980 |
| Revision knee arthroplasty | 00.80, 00.81, 00.82, 00.83, 00.84, 81.55, 80.06, 84.56 (84.56 with knee OA diagnosis) | 0SWC0xx, 0SWD0xx, 0SPC0xx, 0SPD0xx, 0QPD0JZ, 0QPF0JZ, 0SHC08Z, 0SHD08Z | 27486, 27487, 27091, 11981 (11981 with knee OA diagnosis) |
| Heart disease | 410-414, and 428 | I00-I99 | n/a |
| Obesity | V85.3, V85.4, and 278.00, 278.01, 278.03 | E65 to E66.0, E66.1, E66.2, E66.8, E66.9, Z68.3, Z68.4 | n/a |
| Diabetes | 250 | E08 to E13 | n/a |
| Renal failure | 403.01, 403.11, 403.91, 404.02, 404.03, 404.12, 404.13, 404.92, 404.93, 585, 586, 588.0, V42.0, V45.1, V56 | N17, N18, N19, N25.0, I12, I13, Z94.0, Z49 | n/a |

CPT: Current Procedural Terminology; HCPCS: Healthcare Common Procedure Coding System; ICD: International Classification of Diseases; OA: osteoarthritis
